# Supplementary material for: Realizing a broad-scope and high-sensitivity optical thermometer based on dual-emission centers with structure confinement effect-related energy transfer
Source: Royal Society of Chemistry journal article supplement (doi:10.1039/d3tc04139e), 2024-01-01
Supplement: d3tc04139e1.pdf [file d3tc04139e1.pdf]

**Realizing of a broad-scope and high-sensitivity optical thermometer  
based on dual-emission centers with structure confinement effect-  
related energy transfer**

Shixiang Huang<sup>a, #</sup>, Liuhan Yi<sup>a, #</sup>, Feng Zhang<sup>a, \*</sup>, Xiansheng Liu<sup>a</sup>, Chao Li<sup>a, \*</sup>,  
Mengzhu Long<sup>a</sup>, and Yuhua Wang<sup>b</sup>

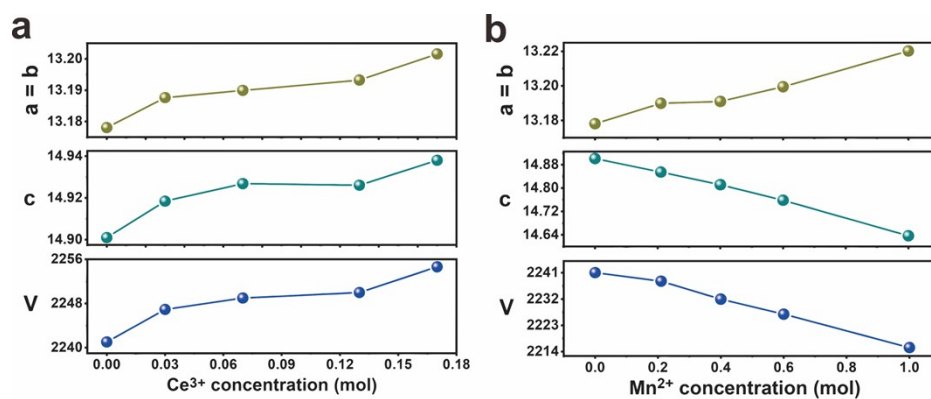

Figure S1 (a) and (b) respectively give the lattice parameters and the unit cell volume depending on the Ce<sup>3+</sup> and Mn<sup>2+</sup> contents in K<sub>7</sub>CaLu<sub>2</sub>B<sub>15</sub>O<sub>30</sub>.

Table S1 The radius percentage difference between matrix cations and doped ions.

| Matrix cation      | Coordination number (n) | Radius (Å) | Dr (%)                                                  |                                                         |
|--------------------|-------------------------|------------|---------------------------------------------------------|---------------------------------------------------------|
|                    |                         |            | Ce <sup>3+</sup> (n = 6, r = 1.01 Å; n = 8, r = 1.14 Å) | Mn <sup>2+</sup> (n = 6, r = 0.67 Å; n = 8, r = 0.96 Å) |
| K <sup>+</sup> (1) | 8                       | 1.51       | 24.30                                                   | 36.40                                                   |
| K <sup>+</sup> (2) | 6                       | 1.38       | 26.80                                                   | 51.40                                                   |
| K <sup>+</sup> (3) | 6                       | 1.38       | 26.80                                                   | 51.40                                                   |
| Ca <sup>2+</sup>   | 6                       | 1.00       | <b>-1.00</b>                                            | <b>33.00</b>                                            |
| Lu <sup>3+</sup>   | 6                       | 0.86       | <b>-17.30</b>                                           | <b>22.20</b>                                            |
| Y <sup>3+</sup>    | 6                       | 0.90       | <b>-12.20</b>                                           | <b>26.60</b>                                            |
| Gd <sup>3+</sup>   | 6                       | 0.94       | <b>-7.7</b>                                             | <b>28.60</b>                                            |

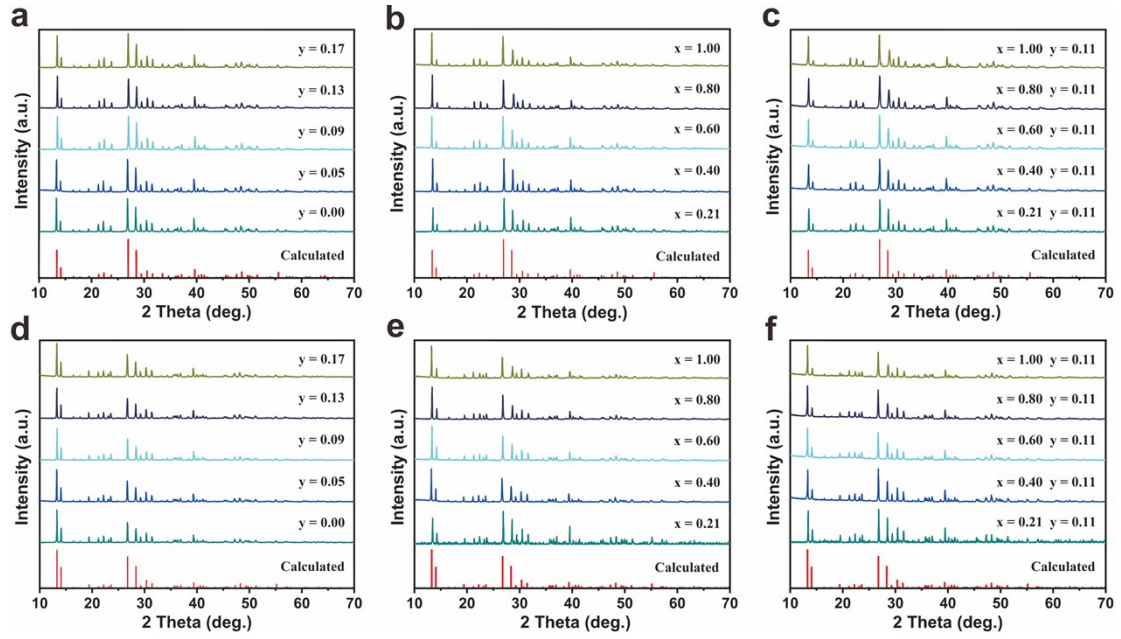

Figure S2 (a) and (b) respectively show the XRD patterns of  $\text{K}_7\text{CaY}_2\text{B}_{15}\text{O}_{30}:\text{Ce}^{3+}$  with different  $\text{Ce}^{3+}$  concentrations and  $\text{K}_7\text{CaY}_2\text{B}_{15}\text{O}_{30}:\text{Mn}^{2+}$  with varied  $\text{Mn}^{2+}$  contents. (c) gives the XRD patterns of the  $\text{K}_7\text{CaY}_2\text{B}_{15}\text{O}_{30}:11\%\text{Ce}^{3+}, x\text{Mn}^{2+}$  samples ( $0 \leq x \leq 1$ ). (d) - (f) display the XRD patterns of the samples  $\text{K}_7\text{CaGd}_2\text{B}_{15}\text{O}_{30}:y\text{Ce}^{3+}$  ( $0 \leq y \leq 0.17$ ),  $\text{K}_7\text{CaGd}_2\text{B}_{15}\text{O}_{30}:x\text{Mn}^{2+}$  ( $0 \leq x \leq 1$ ), and  $\text{K}_7\text{CaGd}_2\text{B}_{15}\text{O}_{30}:11\%\text{Ce}^{3+}, x\text{Mn}^{2+}$  ( $0 \leq x \leq 1$ ).

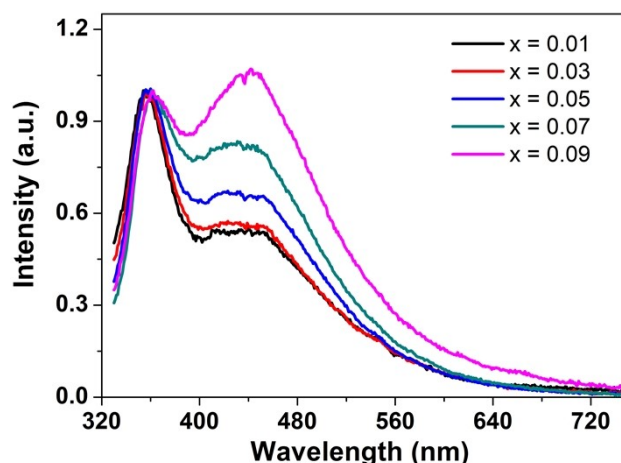

Figure S3 Height-normalized emission spectra around 360 nm ( $\lambda_{\text{ex}} = 310$  nm) of  $\text{K}_7\text{CaLu}_2\text{B}_{15}\text{O}_{30}:\text{xCe}^{3+}$  ( $x = 0.01, 0.03, 0.05, 0.07, 0.09$ ) samples at room temperature.

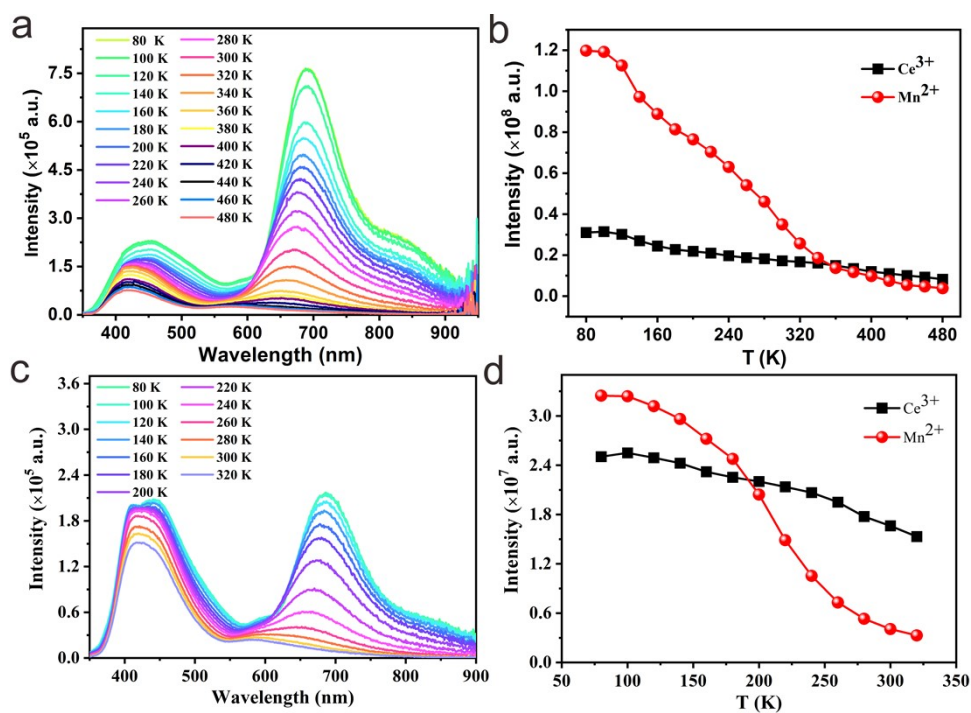

Figure S4 (a) The emission spectra of  $\text{K}_7\text{CaY}_2\text{B}_{15}\text{O}_{30}:0.11\text{Ce}^{3+}, 0.25\text{Mn}^{2+}$  ( $\lambda_{\text{ex}} = 329$  nm) depending on the temperature (80 - 480 K). (b) The temperature dependent emission intensity of  $\text{Ce}^{3+}$  and  $\text{Mn}^{2+}$  in  $\text{K}_7\text{CaY}_2\text{B}_{15}\text{O}_{30}$ . (c) The emission spectra of  $\text{K}_7\text{CaGd}_2\text{B}_{15}\text{O}_{30}:0.11\text{Ce}^{3+}, 0.25\text{Mn}^{2+}$  ( $\lambda_{\text{ex}} = 327$  nm) depending on the temperature (80 - 320 K). (d) The temperature dependent emission intensity of  $\text{Ce}^{3+}$  and  $\text{Mn}^{2+}$  in  $\text{K}_7\text{CaGd}_2\text{B}_{15}\text{O}_{30}$ .

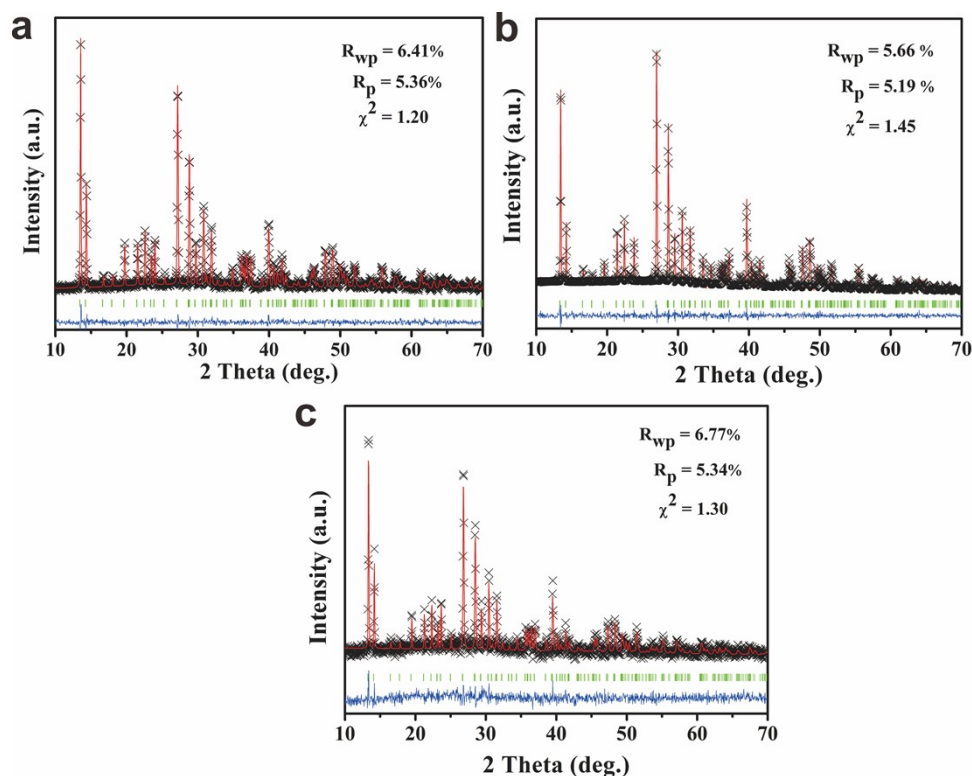

Figure S5 (a)-(c) Rietveld refinement of the XRD profile of  $K_7CaLn_2B_{15}O_{30}:0.11Ce^{3+}, 0.25Mn^{2+}$  (Ln = Lu, Y, Gd).

Table S2. Crystallographic data, refinement parameters, and selected bond lengths for  $K_7CaLn_2B_{15}O_{30}:0.11Ce^{3+}, 0.25Mn^{2+}$  (Ln = Lu, Y, Gd)

|                     | KCLBO:0.11Ce <sup>3+</sup> ,<br>0.25Mn <sup>2+</sup> |             | KCYBO:0.11Ce <sup>3+</sup> ,<br>0.25Mn <sup>2+</sup> |             | KCGBO:0.11Ce <sup>3+</sup> , 0.25Mn <sup>2+</sup> |             |
|---------------------|------------------------------------------------------|-------------|------------------------------------------------------|-------------|---------------------------------------------------|-------------|
| cryst. syst.        | trigonal                                             |             | trigonal                                             |             | trigonal                                          |             |
| space group         | R32                                                  |             | R32                                                  |             | R32                                               |             |
| a (Å)               | 13.2032(0)                                           |             | 13.2835(6)                                           |             | 13.3562(4)                                        |             |
| c (Å)               | 14.8639(6)                                           |             | 14.9441(0)                                           |             | 14.9963(9)                                        |             |
| V (Å <sup>3</sup> ) | 2243.993                                             |             | 2283.652                                             |             | 2316.784                                          |             |
| R <sub>wp</sub> (%) | 6.41                                                 |             | 5.66                                                 |             | 6.77                                              |             |
| R <sub>p</sub> (%)  | 5.36                                                 |             | 5.19                                                 |             | 5.34                                              |             |
| χ <sup>2</sup>      | 1.20                                                 |             | 1.45                                                 |             | 1.30                                              |             |
| Ln-O (Å)            | Lu(1)-O(1)                                           | 2.384(26)×3 | Y(1)-O(1)                                            | 2.269(25)×3 | Gd(1)-O(1)                                        | 2.215(50)×3 |
|                     | Lu(1)-O(1)                                           | 2.438(26)×3 | Y(1)-O(1)                                            | 2.377(30)×3 | Gd(1)-O(1)                                        | 2.748(20)×3 |
| Ca-O (Å)            | Ca(1)-O(4)                                           | 2.3950(9)   | Ca(1)-O(4)                                           | 2.4036(5)   | Ca(1)-O(4)                                        | 2.3476(11)  |
|                     | Ca(1)-O(4)                                           | 2.3940(9)   | Ca(1)-O(4)                                           | 2.4035(5)   | Ca(1)-O(4)                                        | 2.3466(11)  |
|                     | Ca(1)-O(4)                                           | 2.3949(9)   | Ca(1)-O(4)                                           | 2.4027(5)   | Ca(1)-O(4)                                        | 2.3468(11)  |
|                     | Ca(1)-O(4)                                           | 2.3941(9)   | Ca(1)-O(4)                                           | 2.4023(5)   | Ca(1)-O(4)                                        | 2.3470(11)  |
|                     | Ca(1)-O(4)                                           | 2.3936(9)   | Ca(1)-O(4)                                           | 2.4031(5)   | Ca(1)-O(4)                                        | 2.3478(11)  |
|                     | Ca(1)-O(4)                                           | 2.3938(9)   | Ca(1)-O(4)                                           | 2.4023(5)   | Ca(1)-O(4)                                        | 2.3480(11)  |

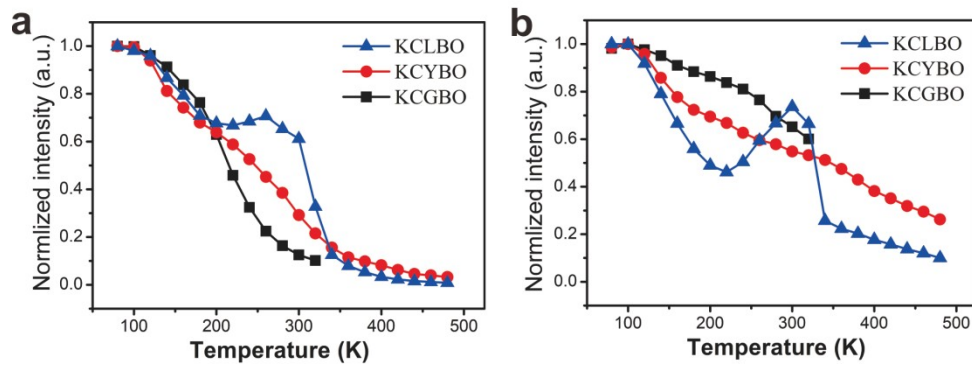

Figure S6 (a) The normalized integral intensity of Mn<sup>2+</sup> depend on the temperature in K<sub>7</sub>CaLn<sub>2</sub>B<sub>15</sub>O<sub>30</sub>:0.11Ce<sup>3+</sup>, 0.25Mn<sup>2+</sup> (Ln = Y, La, Gd). (b) The normalized integral intensity of Ce<sup>3+</sup> depend on the temperature in K<sub>7</sub>CaLn<sub>2</sub>B<sub>15</sub>O<sub>30</sub>:0.11Ce<sup>3+</sup>, 0.25Mn<sup>2+</sup> (Ln = Y, La, Gd).
